# Supplementary material
Source: Springer Nature journal article supplement (https://www.springermedizin.de/resource/supplementary/12986_2005_88_MOESM3_ESM.pdf/25655340)

**A**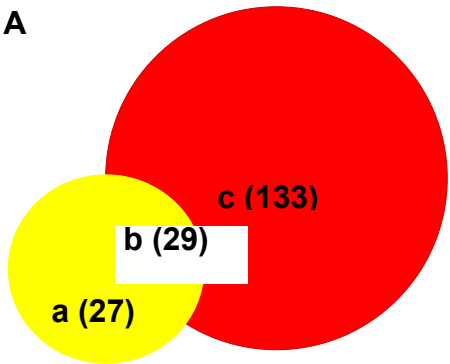**B**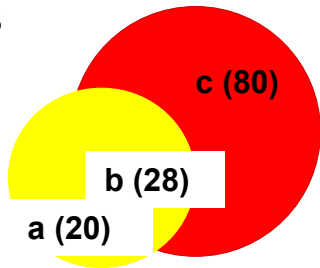**C**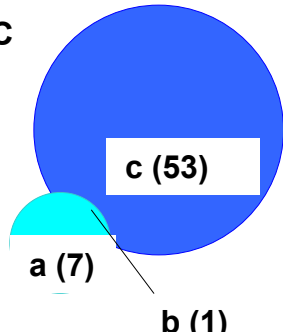

Supplement: MOESM3 [file 25655340]
